# Supplementary material
Source: publisher site journal article supplement (https://www.dovepress.com/article/534606)
Supplement: Supplementary file 1 [file 534606%20Appendices.docx]

# Appendix 1

# Instrumentation

# Inclusive Leadership and Employee Creativity (Carmeli et al., 2010)

not at all – a little – somewhat – a lot – to a large extent

IL1 The manager is open to hearing new ideas (Openness)

IL2 The manager is attentive to new opportunities to improve work processes (Openness)

IL3 The manager is open to discuss the desired goals and new ways to achieve them (Openness)

IL4 The manager is available for consultation on problems (availability)

IL5 The manager is an ongoing ‘presence’ in this team-someone who is readily available (availability)

IL6 The manager is available for professional questions I would like to consult with him/her (availability)

IL7 The manager is ready to listen to the requests (availability)

IL8 The manager encourages me to access him/her on emerging issues (accessibility)

IL9 The manager is accessible for discussing emerging problems (accessibility)

Cultural Competence Assessment Instrument (CCAI-UIC) (Balcazar et al. ,2009)

Strongly agree - Agree – Neither Agree or Disagree- Disagree - Strongly disagree

CC1 Cultural competence is included in the workplace’s mission statement, policies and procedures.

CC2 The organization does not provide ongoing training on cultural competence.

CC3 I have opportunities to learn culturally responsive behaviors from peers.

CC4 I do not feel that I have the skills to provide services to ethnic minority clients.

CC5 The way services are structured in the setting makes it difficult to identify the cultural values of the clients.

CC6 I would find it easy to work competently with ethnic minority clients.

# Climate for Inclusion (Nishii, 2013)

Strongly agree - Agree – Neither Agree or Disagree- Disagree - Strongly disagree

*Dimension 1: Foundation of equitable employment practices*

CiD1.1 The workplace has a fair promotion process.

CiD1.2 The performance review process is fair in this workplace.

CiD1.3 The workplace invests in the development of all of its employees.

*Dimension 2: Integration of differences*

CiD2.1 In the workplace, employees are comfortable being themselves.

CiD2.2 In the workplace, people’s differences are respected.

CiD2.3 Employees of the workplace are valued for who they are as people, not just for the jobs that they fill.

*Dimension 3: Inclusion in decision making*

CiD3.1 In the workplace, employees’ insights are used to rethink or redefine work practices.

CiD3.2 The way services are structured in the setting makes it difficult to identify the cultural values of the clients.

CiD3.3 In this workplace, everyone’s ideas for how to do things better are given serious consideration.

# Short Index of Job Satisfaction (SIJS) (Judge, Bono, & Locke, 2020)

Strongly agree - Agree – Neither Agree or Disagree- Disagree - Strongly disagree

SIJS1. I feel fairly satisfied with my present job.

SIJS2. Most days I am enthusiastic about my work.

SIJS3. Each day at work seems like it will never end

SIJS4. I find real enjoyment in my work.

SIJS5. I consider my job to be rather unpleasant

# Healthcare Quality Perception (HQP) questionnaire (Kamalasanan et al., 2020)

Strongly agree - Agree – Neither Agree or Disagree- Disagree - Strongly disagree

*Planning & Documentation*

HQP1. Our hospital has a well-defined operational plan for controlling both clinical and non-clinical processes in an efficient manner.

HQP2. I can voice my views in the planning process and participate in my department level planning.

HQP3. I’m aware of the organization's mission statement

*Employee Participation in Quality Management Activities*

HQP4. I am encouraged to take part in quality management activities along with my routine work

HQP5 I have been involved as a team member in the conduct of internal quality audit(s) to monitor the quality standards at periodic intervals.

*Existence of Policies/Procedures/Guidelines*

HQP6. All patient care activities are carried out as per protocol mentioned in the policies and procedural manual.

HQP7. I am aware of my responsibilities to execute the defined policies and procedures for my area of work.

# Pilot Study Scales

SECTION: Inclusive Leadership {IL} Scale

INSTRUCTIONS: This part of the survey explores your experiences as an employee and your relationship with your leader. Using the following scale please indicate how much you agree or disagree with each of the following statements. Please read each statement and choose the statement that corresponds with your level of agreement from 'Strongly Disagree' to 'Strongly Agree'.

SCALE: 1 = Strongly disagree, 2 = Disagree, 3 = Neutral, 4 = Agree, 5 = Strongly agree

QUESTIONS:

1. In my workplace my leader promotes an environment where all employees feel welcome and valued regardless of their background or identity.
2. My leader actively seeks out diverse perspectives and ideas when making decisions.
3. My leader encourages open communication and dialogue, even when opinions differ.
4. My leader recognizes and celebrates the unique contributions of each employee on our team.
5. My leader creates opportunities in my organization for all employees to participate and contribute to team projects and initiatives.
6. My leader actively addresses issues of bias and discrimination in the workplace.
7. My leader values and supports the professional development and growth of all employees, regardless of their background or identity.
8. My leader ensures that policies and procedures are inclusive and do not discriminate against any employees.
9. My leader takes action to address and prevent harassment or discrimination based on any aspect of identity {e.g., race, gender, sexual orientation, etc.}.
10. My leader encourages teamwork and collaboration among employees with diverse backgrounds and perspectives.
11. The manager is open to hearing new ideas.
12. The manager encourages me to access him/her on emerging issues.
13. I find that my values and the company's values are very similar.

SECTION: Cultural Competence Assessment Instrument {CCAI}

INSTRUCTIONS: Considering your work over the past year, please rate the following statements.
SCALE: 5 = Strongly agree, 4 = Agree, 3 = Neither Agree nor Disagree, 2 = Disagree, 1 = Strongly disagree

1. I feel that I can learn from my ethnic minority clients.
2. It is hard adjusting my therapeutic strategies with ethnic minority clients.
3. I am effective in my verbal communication with clients whose culture is different from mine.
4. My organization does not provide ongoing training on cultural competence.
5. I do not consider the cultural backgrounds of my clients when food is involved.
6. I receive feedback from supervisors on how to improve my practice skills with clients from different ethnic minority backgrounds.
7. At work, pictures, posters, printed materials and toys reflect the culture and ethnic backgrounds of ethnic minority clients.
8. I feel confident that I can learn about my clients’ cultural background.
9. Cultural competence is included in my work place’s mission statement, policies and procedures.
10. I am effective in my nonverbal communication with clients whose culture is different from mine.
11. The way services are structured in my setting makes it difficult to identify the cultural values of my clients.
12. I feel that I have limited experience working with ethnic minority clients.
13. It is difficult to practice skills related to cultural competence.
14. I am sensitive to valuing and respecting differences between my cultural background and my clients’ cultural heritage.
15. My workplace does not support using resources to promote cultural competence.
16. I have opportunity in my organization to learn culturally responsive behaviors from peers.
17. I do not feel that I have the skills to provide services to ethnic minority clients.
18. I examine my own biases related to race and culture that may influence my behavior as a service provider.
19. I actively strive for an atmosphere that promotes risk taking and self-exploration.
20. My work place does not support my participation in cultural celebrations of my clients.
21. I would find it easy to work competently with ethnic minority clients.
22. I openly discuss with others issues I may have in developing multicultural awareness.
23. I learn about different ethnic cultures through educational methods and/or life experiences.
24. It is difficult for me to accept that religious beliefs may influence how ethnic minorities respond to illness and disability.

SECTION: Social Desirability Response Set {SDRS-5}

INSTRUCTIONS: Listed below are a few statements about your relationships with others. How much is each statement TRUE or FALSE for you?

SCALE: 1 = Definitely True, 2 = Mostly True, 3 = Don't Know, 4 = Mostly False, 5 = Definitely False

QUESTIONS:

1. I am always courteous even to people who are disagreeable.
2. There have been occasions when I took advantage of someone.
3. I am always courteous even to people who are disagreeable.
4. There have been occasions when I took advantage of someone.
5. I sometimes try to get even rather than forgive and forget.
6. I sometimes feel resentful when I don’t get my way.
7. No matter who I’m talking to, I’m always a good listener.

SECTION: Climate for Inclusion

INSTRUCTIONS: Please rate the following statements regarding your organization.

SCALE: 5 = Strongly agree, 4 = Agree, 3 = Neither Agree nor Disagree, 2 = Disagree, 1 = Strongly disagree

QUESTIONS:

1. This organization has a fair promotion process.
2. The performance review process is fair in this organization.
3. This organization has a fair promotion process.
4. The performance review process is fair in this organization.
5. This organization invests in the development of all of its employees.
6. Employees in this organization receive “equal pay for equal work.”
7. This organization provides safe ways for employees to voice their grievances.
8. This organization is characterized by a non-threatening environment in which people can reveal their “true” selves.
9. This organization values work-life balance.
10. This organization commits resources to ensuring that employees are able to resolve conflicts effectively.
11. In this organization, people often share and learn about one another as people.
12. This organization has a culture in which employees appreciate the differences that people bring to the workplace.
13. In this organization, employee input is actively sought.
14. In this organization, everyone’s ideas for how to do things better are given serious consideration.
15. In this organization, employees’ insights are used to rethink or redefine work practices.
16. Top management exercises the belief that problem-solving is improved when input from different roles, ranks, and functions is considered.

SECTION: Short Index of Job Satisfaction {SIJS}

INSTRUCTIONS: Please rate the following statements about your job satisfaction.

SCALE: 5 = Strongly agree, 4 = Agree, 3 = Neither Agree nor Disagree, 2 = Disagree, 1 = Strongly disagree

QUESTIONS:

1. I feel fairly satisfied with my present job.
2. Most days I am enthusiastic about my work.
3. Each day at work seems like it will never end.
4. I find real enjoyment in my work.
5. I consider my job to be rather unpleasant.

SECTION: Healthcare Quality Perception {HQP} scale by Kamalasanan et al. {2020}

INSTRUCTIONS: Please rate the following statements regarding the healthcare quality perception in your organization.

SCALE: 5 = Strongly agree, 4 = Agree, 3 = Neither Agree nor Disagree, 2 = Disagree, 1 = Strongly disagree

QUESTIONS:

1. My organization has a well-developed documentation plan {i.e. Forms, templates, routing slips, etc.} for all the departments to streamline their workflow.
2. I am aware that the organization has a quality and safety manual.
3. I feel that the provisions for quality management systems are in place.
4. Our organization has a well-defined operational plan for controlling both clinical and nonclinical processes in an efficient manner.
5. Our organization has a well-defined operational plan for controlling both clinical and nonclinical processes in an efficient manner.
6. I can voice my views in the planning process and get in my department level planning.
7. I am provided with a job description explaining my roles, responsibilities and tasks.
8. I am encouraged to take part in quality management activities along with my routine work.
9. My organization has a reporting system that permits me to report my views without hesitation.
10. My organization management monitors whether the employee adheres to the work plan assigned to him/her as per the quality standards stipulated by the organization.
11. I was asked directly or through satisfaction surveys whether I am satisfied with my work and my workload.
12. I have been involved as a team member in the conduct of internal quality audits to monitor the quality standards at periodic intervals.
13. I am aware that there exist updated policies/guidelines for clinical procedures.
14. I am aware that there exist updated policies/guidelines for organization/departmental administrative procedures.
15. I have been involved in the preparation of policies/guidelines for my department/organization.
16. All patient care activities in my organization are carried out as per protocols mentioned in the policies and procedural manual.
17. I am aware of my responsibilities to execute the defined policies and procedures for my area of work.
18. Internal medical audit/accreditation/peer review within the group on quality and safety occur in my organization {i.e. there is internal scrutiny by experts reviewing clinical care settings to improve the quality of healthcare}.
19. Individual patient care exists in my organization {i.e. the treatment provided is recorded and regularly evaluated in relation to stated objectives}.
20. External audit happens in my organization {i.e. colleagues from similar institutions assess quality systems of my organization with suggestions for improvement}.
21. I am aware of relevant quality tools to improve patient safety in my organization/department. {i.e. there are check sheets, activity network diagrams, root cause analysis, 5S, etc.
22. In my organization, there is a system in place to track safety-related issues noticed during patient care and evaluate outcomes, {through management information systems like MIS/EHS/paper-based system, etc.}.
23. My organization reports adverse events and takes prompt actions {i.e. there are systems for clinical staff members to report freely on all matters, including unexpected issues of patient care}.
24. There exist risk management units or personnel in my organization {i.e. there are processes in place to identify, assess and manage unforeseen clinical adversities}.
25. Regular patients’ feedback is gathered to devise strategies for enhancing quality and safety management {i.e. patient satisfaction surveys are provided on the subject of care}.
26. There is a system for monitoring patient complaints {i.e. there exists a complaints committee for the reception, arbitration and evaluation for improvement}.
27. I have observed increased patient satisfaction.
28. I have observed increased staff satisfaction.
29. I have observed increased management controllability of the organization.
30. I have observed an improvement of the overall picture of the organization {brand image}.
31. I have observed improvement in patient treatment/care processes.
32. I have observed cost savings in the long run.
33. I have observed improvement in the number and nature of regulations and procedures in the organization.
34. Continuous training programs are necessary for my professional development.
35. My organization regularly imparts necessary training on quality management and
     improvement methods.
36. My department encourages me to attend/participate in quality improvement
     training programs.
37. On-the-job training is required to update my skills in the organization.
38. I can apply the knowledge which I gained through training programs.

# Inclusive Leadership in Health Care Management Consolidated Short Form {ILHCM-CSF}

## SECTION: Inclusive Leadership {IL} Scale

INSTRUCTIONS: This part of the survey explores your experiences as an employee and your relationship with your leader. Using the following scale please indicate how much you agree or disagree with each of the following statements. Please read each statement and choose the statement that corresponds with your level of agreement from 'Strongly Disagree' to 'Strongly Agree'.

SCALE: 1 = Strongly disagree, 2 = Disagree, 3 = Neutral, 4 = Agree, 5 = Strongly agree

QUESTIONS:

1. In my workplace my leader promotes an environment where all employees feel welcome
    and valued regardless of their background or identity.
2. My leader actively seeks out diverse perspectives and ideas when making decisions.
3. My leader encourages open communication and dialogue, even when opinions differ.
4. My leader recognizes and celebrates the unique contributions of each employee on our
    team.
5. My leader creates opportunities in my organization for all employees to participate and
    contribute to team projects and initiatives.
6. My leader actively addresses issues of bias and discrimination in the workplace.
7. My leader values and supports the professional development and growth of all
    employees, regardless of their background or identity.
8. My leader ensures that policies and procedures are inclusive and do not discriminate
    against any employees.

**SECTION: Cultural Competence Assessment Instrument {CCAI}**

INSTRUCTIONS: Considering your work over the past year, please rate the following statements.

SCALE: 5 = Strongly agree, 4 = Agree, 3 = Neither Agree nor Disagree, 2 = Disagree, 1 = Strongly disagree

QUESTIONS:

1. I feel that I can learn from my ethnic minority clients.
2. It is hard adjusting my therapeutic strategies with ethnic minority clients.
3. I am effective in my verbal communication with clients whose culture is different from
    mine.
4. My organization does not provide ongoing training on cultural competence.
5. I do not consider the cultural backgrounds of my clients when food is involved.
6. I receive feedback from supervisors on how to improve my practice skills with clients
    from different ethnic minority backgrounds.
7. At work, pictures, posters, printed materials and toys reflect the culture and ethnic
    backgrounds of ethnic minority clients.

**SECTION: Social Desirability Response Set {SDRS-5}**

INSTRUCTIONS: Listed below are a few statements about your relationships with others. How much is each statement TRUE or FALSE for you?

SCALE: 1 = Definitely True, 2 = Mostly True, 3 = Don't Know, 4 = Mostly False, 5 = Definitely False

QUESTIONS:

1. I am always courteous even to people who are disagreeable.
2. There have been occasions when I took advantage of someone.
3. I am always courteous even to people who are disagreeable.
4. There have been occasions when I took advantage of someone.

**SECTION: Climate for Inclusion {CiD}**

INSTRUCTIONS: Please rate the following statements regarding your organization.

SCALE: 5 = Strongly agree, 4 = Agree, 3 = Neither Agree nor Disagree, 2 = Disagree, 1 =

Strongly disagree

QUESTIONS:

1. This organization has a fair promotion process.
2. The performance review process is fair in this organization.
3. This organization has a fair promotion process.
4. The performance review process is fair in this organization.
5. This organization invests in the development of all of its employees.
6. Employees in this organization receive “equal pay for equal work.”
7. This organization provides safe ways for employees to voice their grievances.
8. This organization is characterized by a non-threatening environment in which people can
    reveal their “true” selves.
9. This organization values work-life balance.
10. This organization commits resources to ensuring that employees are able to resolve
     conflicts effectively.
11. In this organization, people often share and learn about one another as people.
12. This organization has a culture in which employees appreciate the differences that people
     bring to the workplace.
13. In this organization, employee input is actively sought.
14. In this organization, everyone’s ideas for how to do things better are given serious
     consideration.
15. In this organization, employees’ insights are used to rethink or redefine work practices.
16. Top management exercises the belief that problem-solving is improved when input from
     different roles, ranks, and functions is considered.

**SECTION: Short Index of Job Satisfaction {SIJS}**

INSTRUCTIONS: Please rate the following statements about your job satisfaction.

SCALE: 5 = Strongly agree, 4 = Agree, 3 = Neither Agree nor Disagree, 2 = Disagree, 1 = Strongly disagree

QUESTIONS:

1. I feel fairly satisfied with my present job.
2. Most days I am enthusiastic about my work.

**SECTION: Healthcare Quality Perception** {HQP} scale by Kamalasanan et al. {2020}

INSTRUCTIONS: Please rate the following statements regarding the healthcare quality perception in your organization.

SCALE: 5 = Strongly agree, 4 = Agree, 3 = Neither Agree nor Disagree, 2 = Disagree, 1 = Strongly disagree

QUESTIONS:

1. My organization has a well-developed documentation plan {i.e., forms, templates, routing
    slips, etc.} for all the departments to streamline their workflow.
2. I am aware that the organization has a quality and safety manual.
3. I feel that the provisions for quality management systems are in place.
4. Our organization has a well-defined operational plan for controlling both clinical and
    nonclinical processes in an efficient manner.
5. Our organization has a well-defined operational plan for controlling both clinical and
    nonclinical processes in an efficient manner.
6. I can voice my views in the planning process and get in my department level planning.
7. I am provided with a job description explaining my roles, responsibilities and tasks.
8. I am encouraged to take part in quality management activities along with my routine
    work.
9. My organization has a reporting system that permits me to report my views without
    hesitation.
10. My organization management monitors whether the employee adheres to the work plan
     assigned to him/her as per the quality standards stipulated by the organization.

# Appendix 2
